# Supplementary material
Source: PubMed Central journal article supplement (PMC7368265)
Supplement: pnas.2002008117.sapp.pdf [file pnas.2002008117.sapp.pdf]

# PNAS

www.pnas.org

Supplementary Information for

## **On the enigmatic disappearance of Rauber's layer**

Jessica van Leeuwen, Pisana Rawson, Debra K. Berg, David N. Wells and Peter L. Pfeffer

*Peter L. Pfeffer* Email: [peter.pfeffer@vuw.ac.nz](mailto:peter.pfeffer@vuw.ac.nz)

**This PDF file includes:**

- SI Materials and References
- Figures S1 to S3
- Tables S1 to S4
- SI References

## **Supplementary Information Materials and Methods**

### Whole mount cell proliferation assay in cattle embryos

Embryos were fixed for 4-6 hours in 4% PFA (paraformaldehyde)/PBS on ice. Subsequent steps were carried out in 2 ml microcentrifuge tubes with gentle rocking (40 rpm) at room temperature (R.T.) with 5 min washes unless specified. Post fixing, embryos were washed three times in 0.1% Tween-20/PBS (PBT), treated overnight (O/N) at 4°C with 0.1% H<sub>2</sub>O<sub>2</sub> in PBS and stored in 0.02% thimerosal (Sigma) in PBS at 4°C until used.

Embryos were washed 3 x 1 h in PBT, 1 h with PBT/1% BSA (Sigma), then 1 h PBT/1% BSA/10% heat treated lamb serum (antibody dilution buffer). They were then incubated O/N at 4°C with antibody (Ab) dilution buffer containing 1/200 dilution of anti-phospho-Histone H3 Ab (#06-570 Upstate Biotechnologies), then washed as the day before incubating with preabsorbed goat anti-rabbit horse radish peroxidase conjugated Ab (GAR-HRP; Sigma-Aldrich A6154) overnight. Preabsorption was performed by adding 10 µl Ab to 0.5 ml 0.1% Triton X-100 (AppliChem, A13880500)/PBS (PBX), 5 µl heat treated lamb serum and 2 mg of bovine embryo powder, rocking gently 1 h at 4°C, then centrifuging at 13000 x g for 10 min at 4°C and adding the supernatant to 1.5 ml of Ab dilution buffer. Embryos were washed 3 x 1 h with 0.1% PBX, twice 10 min with Tris-HCl buffer pH 7.4. For staining, 3,3 diaminobenzidine tetrahydrochloride (DAB; Sigma) was prepared fresh (5 mg in 10 ml of Tris-HCL pH 7.4) and embryos incubated 1 h in the dark at 4°C. The DAB solution was then replaced with fresh DAB solution containing a 1/10,000 dilution of 30% H<sub>2</sub>O<sub>2</sub> (BDH). Embryos were incubated 5 to 30 min in the dark with rocking, during which time colour production was monitored. The reaction was stopped by several rinses in water, then PBS and embryos photographed whole in concavity slides. Some embryos were then embedded in agarose and histologically sectioned.

### Apoptosis assay for cattle embryos

Steps were carried out at R.T. in 4 well plates (Nunc, Denmark) with gentle rocking/shaking at approximately 40 rpm unless specified. Embryos were fixed for 4-6 hours in 4% PFA/PBS on ice, then progressively dehydrated (10 min 25%, 50%, 75% methanol/PBS), then washed and stored at -20°C in 100% methanol. Embryos were treated with 3% H<sub>2</sub>O<sub>2</sub> in methanol for 1 h (R.T.), before rehydrating (10 min each: 75%, 50%, 25% methanol/PBS), washing 3 x 5 min and 1 x 15 min with 1% BSA/PBX (PBX-BSA) and blocking 1 h in PBX-BSA/10% heat treated lamb serum. After 15 min in 50 mM NH<sub>4</sub>Cl, they were rocked O/N at 4°C with a 1/400 dilution of active caspase 3 antibody (9661, Cell Signaling Technology) in PBX-BSA/5% heat-treated (50°C, 30 min) lamb serum. Embryos were washed 3 x 5 min with PBX, 3 x 1 h with Ab dilution buffer, then O/N with 1/2000 dilution of preabsorbed GAR-HRP Ab as described for the proliferation assay.

### Apoptosis assay for cell lines

Cells were plated at 3 x 10<sup>5</sup> cells/well in 6 well plates, grown overnight, then media was replaced with 1 ml of PBS and cells exposed (controls not) to 90 mJ/cm<sup>2</sup> 254 nm UV radiation in a UV

Stratalinker 1800 (Agilent Technologies) to induce apoptosis. PBS was replaced with media and cells harvested after 24 h, the pellet washed in PBS, then resuspended in 55 µl of cell lysis buffer from the EnzCheck Caspase 3 assay kit (Molecular probes). Five microliters were removed and used for protein concentration analysis using the BCA protein assay kit (Thermofisher). Fifty microlitres were used in the EnzCheck Caspase 3 assay following the manufacturer's instructions. The fluorescent product of the assay was measured using a Genesis Synergy 2 plate reader (Millenium Science) at 342 nm excitation and 441 nm emission wavelength. Fluorescent readings were normalised against protein concentration to minimise the effect of different cell numbers in each well. Experiments were performed in triplicate.

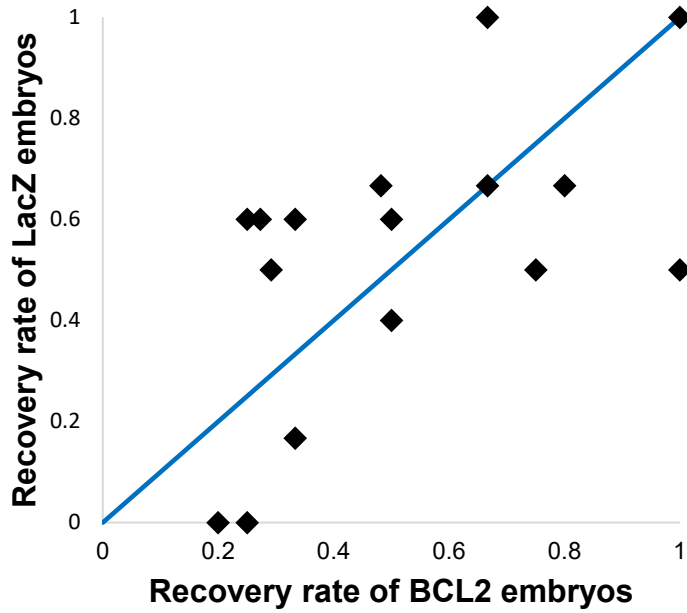

**Fig. S1. Fraction of co-transferred BCL2 and LacZ transgenic embryos transferred that were recovered.** No difference in the recovery rate of *LacZ* versus *BCL2* embryos recovered per cow. Each point is from an individual recipient cow, cows that showed higher recovery rates for *BCL2* embryos also had a higher recovery rate of *LacZ* embryos. A 50:50 proportion line is shown (blue).

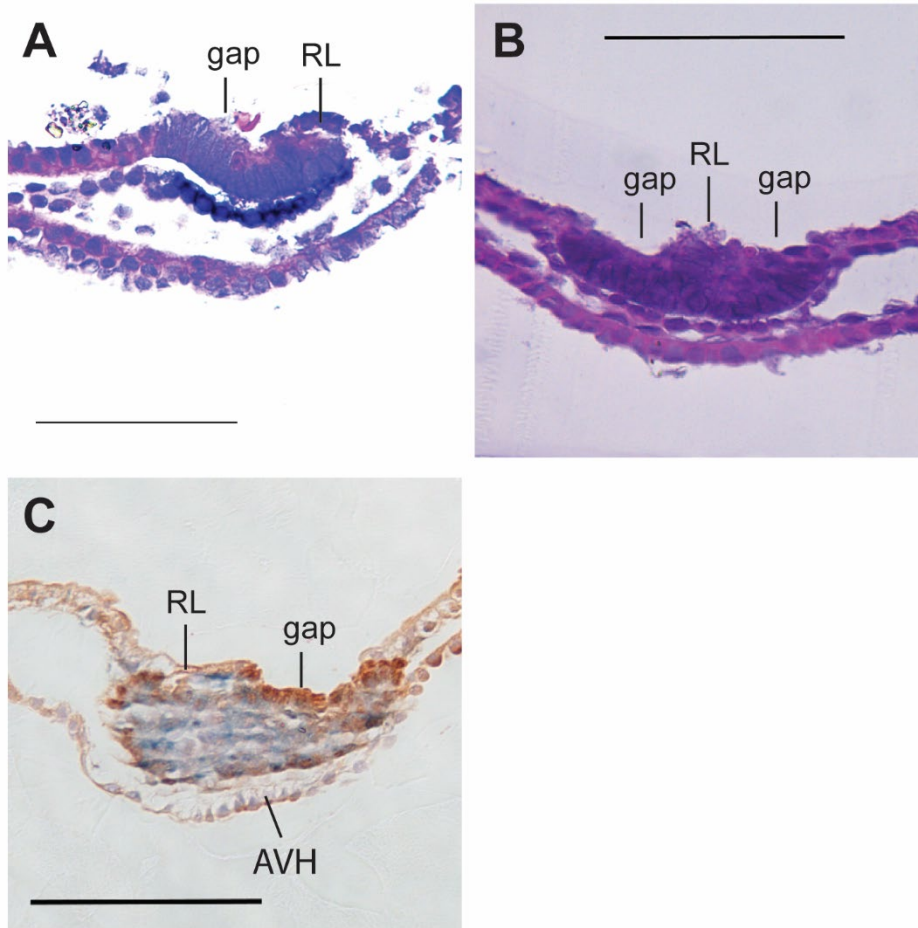

**Fig. S2. Gaps in Rauber's layer and AVH formation in wild type embryos.** A, B. Saggital section of embryos with Rauber's layer beginning to disintegrate and no visceral hypoblast thickening. C. Cross-section of embryo in which a gap in Rauber's layer overlies the AVH. Bar is 100  $\mu$ m.

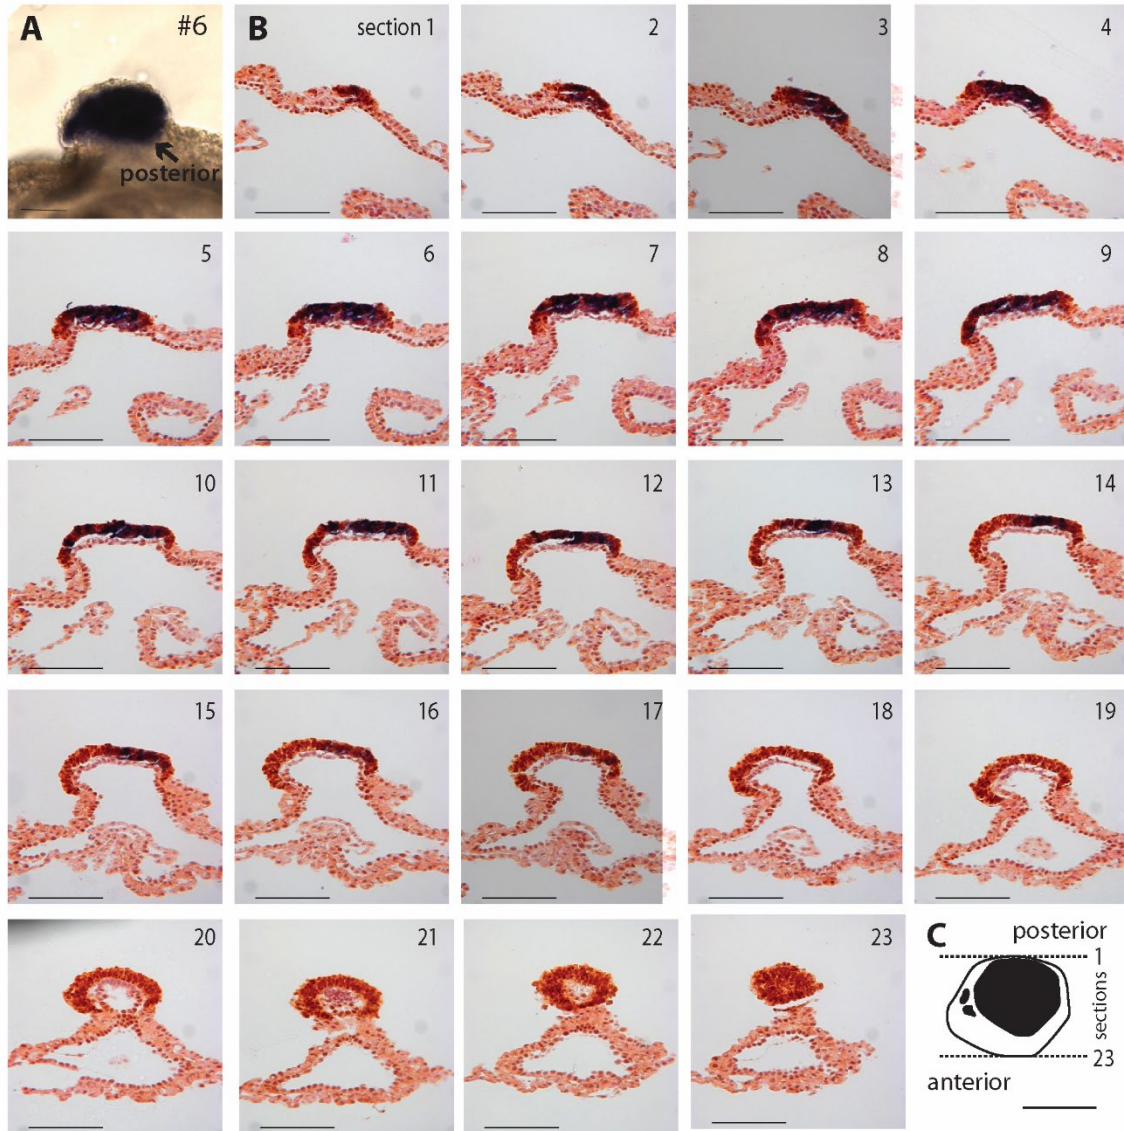

**Fig. S3. BCL2-tg embryo #6 stained for BRACHYURY mRNA (dark blue) and OCT4 protein (brown).** A. Rear/side whole mount view of E15 embryo #6 exhibiting an abnormal anterior extension of BRA expression. B. Series of 23 oblique transverse 8  $\mu$ m sections as shown in panel C. C. Dorsal view-reconstruction of BRA stain (in black). Scale bar, 100  $\mu$ m.

**Table S1. Correlation between polar trophoblast fate and proamniotic cavity formation.**

| <b>ORDER<sup>1</sup></b> | <b>Species (<i>Genus</i>)</b> | <b>Polar TB kept?</b>                                 | <b>Proamniotic cavity</b> | <b>Amnion formation</b> | <b>Ref.</b>         |
|--------------------------|-------------------------------|-------------------------------------------------------|---------------------------|-------------------------|---------------------|
|                          | <b>EUARCHONTOGLIRES</b>       |                                                       |                           |                         |                     |
|                          | <b>S</b>                      |                                                       |                           |                         |                     |
| <b>Primates</b>          |                               |                                                       |                           |                         |                     |
|                          | Hominidae                     | Humans                                                | Yes                       | Yes                     | Cavitation (1, 2)   |
|                          | Cercopithecidae               | Rhesus Macaque, Proboscis monkey, “Old world monkeys” | Yes                       | Yes                     | Cavitation (2-4)    |
|                          | Callitrich/Cebidae            | Marmoset, Capuchin, “New world monkeys”               | Yes                       | Yes                     | Cavitation (4)      |
|                          | Tarsiidae                     | Tarsier                                               | No                        | No <sup>2,3</sup>       | Folding (4, 5)      |
|                          | Lorisidae                     | Loris                                                 | No                        | No                      | Folding (4, 6)      |
|                          | Galagidae                     | Bushbaby ( <i>Galago</i> )                            | No                        | No                      | Folding (7)         |
| <b>Dermoptera</b>        |                               |                                                       |                           |                         |                     |
|                          | Cynocephalidae                | Sunda colugo ( <i>Galeopithecus</i> )                 | Yes                       | Yes                     | Cavitation (8)      |
| <b>Lagomorpha</b>        |                               |                                                       |                           |                         |                     |
|                          | Leporidae                     | Rabbit                                                | No                        | No                      | Folding (9)         |
| <b>Rodentia</b>          |                               |                                                       |                           |                         |                     |
|                          | Muridae                       | Mouse, Rat                                            | Yes                       | Yes                     | Folding (9)         |
|                          | Cricetidae                    | Vole                                                  | Yes                       | Yes                     | Folding (10)        |
|                          | Heteromyidae                  | Kangaroo Rat                                          | Yes                       | Yes                     | Folding (9)         |
|                          | Caviidae                      | Guinea Pig                                            | Yes                       | Yes                     | Cavitation (11, 12) |
|                          | Chinchillidae                 | Chinchilla                                            | Yes                       | Yes                     | Cavitation (12)     |
|                          | Sciuridae                     | (13-striped-)/ Ground Squirrel                        | No                        | No                      | Folding (13, 14)    |
| <b>Scandentia</b>        |                               |                                                       |                           |                         |                     |
|                          | Tupaiaidae                    | Tree shrew                                            | No                        | No                      | Folding (9),(15)    |
|                          | <b>LAURASIATHERIA</b>         |                                                       |                           |                         |                     |
| <b>Cetartiodactyla</b>   |                               |                                                       |                           |                         |                     |
|                          | Bovidae                       | Cattle, Sheep                                         | No                        | No <sup>2</sup>         | Folding (16, 17)    |
|                          | Cervidae                      | Deer                                                  | No                        | No                      | Folding (18)        |
|                          | Suidae                        | Pig                                                   | No                        | No <sup>2</sup>         | Folding (19-21)     |
| <b>Carnivora</b>         |                               |                                                       |                           |                         |                     |
|                          | Felidae                       | Cat                                                   | No                        | No                      | Folding (22)        |
|                          | Canidae                       | Dog                                                   | No                        | No                      | Folding (22, 23)    |

| <b>ORDER<sup>1</sup></b> | <b>Family</b>    | <b>Species (<i>Genus</i>)</b>                                              | <b>Polar TB kept?</b> | <b>Proamniotic cavity</b> | <b>Amnion formation</b> | <b>Ref.</b> |
|--------------------------|------------------|----------------------------------------------------------------------------|-----------------------|---------------------------|-------------------------|-------------|
|                          | Mustelidae       | Ferret                                                                     | No                    | No                        | Folding                 | (24)        |
| <b>Pholidota</b>         | Manidae          | Pangolin                                                                   | No                    | No                        | Folding                 | (9)         |
| <b>Perrisodactyla</b>    | Equidae          | Horse                                                                      | No                    | No                        | Folding                 | (25)        |
| <b>Chiroptera</b>        | Vespertilionidae | Vesper bats, African yellow bat                                            | Yes                   | Yes                       | Cavitation              | (9, 26, 27) |
|                          | Miniopteridae    | Natal clinging bat ( <i>Miniopterus</i> )                                  | Yes                   | Yes                       | Folding                 | (27-29)     |
|                          | Noctilionidae    | Lesser bulldog bat                                                         | Yes                   | Yes                       | Cavitation              | (30)        |
|                          | Phyllostomidae   | Leaf-nosed bats ( <i>Macrotus</i> , <i>Glossophaga</i> , <i>Carollia</i> ) | Yes                   | Yes                       | Cavitation              | (31-33)     |
|                          | Pteropodidae     | Flying fox ( <i>Pteropus</i> )                                             | Yes                   | Yes                       | Cavitation              | (9)         |
| <b>Eulipotyphla</b>      | Erinaceae        | Hedgehog ( <i>Erinaceus</i> )                                              | Yes                   | Yes                       | Cavitation              | (34)        |
|                          | Soricidae        | Shrew, Musk shrew ( <i>Suncus</i> )                                        | No                    | No                        | Folding                 | (35, 36)    |
|                          | Talpidae         | Mole ( <i>Talpa</i> )                                                      | No                    | No                        | Folding                 | (9)         |
| <b>AFROTHERIA</b>        |                  |                                                                            |                       |                           |                         |             |
| <b>Afrosoricida</b>      | Tenrecidae       | Tenrec ( <i>Hemicentetes</i> )                                             | Yes                   | Yes                       | Cavitation              | (37, 38)    |
|                          | Chrysochloridae  | Golden mole ( <i>Eremitalpa</i> )                                          | No                    | No                        | Folding                 | (39)        |
| <b>Macroscelidea</b>     | Macroscelididae  | Elephant shrew                                                             | Yes                   | Yes                       | Cavitation              | (40)        |
| <b>XENARTHRA</b>         |                  |                                                                            |                       |                           |                         |             |
| <b>Cingulata</b>         | Dasypodidae      | 9-banded Armadillo                                                         | Yes                   | Yes                       | Cavitation              | (41)        |

<sup>1</sup> Within orders, successive families are, where possible, arranged in increasing order of diversity.

<sup>2</sup> Cavitation within epiblast and/or between epiblast and Rauber's layer is very transient and disappears as Rauber's layer is lost.

<sup>3</sup> See section 37b, 39a and 40b of ref. (5) for examples of transient cavitation with cavities opening out to the uterine fluid.



**Table S2.** In vitro development to Day 7 of zona free nuclear transfer transgenic embryos (runs 1-4).

| <i>SCNT<br/>Run</i> | <i>Cell<br/>Line</i> | <i>Eggs<br/>fused</i> | <i>2-Cell</i> | <i>Early<br/>Development<sup>a</sup></i> |                      | <i>Late<br/>Development<sup>b</sup></i> |                      |
|---------------------|----------------------|-----------------------|---------------|------------------------------------------|----------------------|-----------------------------------------|----------------------|
|                     |                      |                       |               | <i>(%)</i>                               | <i>P<sup>c</sup></i> | <i>(%)</i>                              | <i>P<sup>c</sup></i> |
| 1                   | BCL2 5               | 69                    | 67            | 28 (42)                                  | 0.98                 | 22 (79)                                 | 0.32                 |
|                     | BCL2 51              | 70                    | 65            | 29 (45)                                  | 1.00                 | 19 (66)                                 | 1.00                 |
|                     | LacZ 7               | 73                    | 69            | 30 (43)                                  |                      | 19 (63)                                 |                      |
| 2                   | BCL2 5               | 95                    | 94            | 71 (76)                                  | 0.07                 | 34 (48)                                 | 1.00                 |
|                     | LacZ 1               | 99                    | 98            | 61 (62)                                  |                      | 30 (49)                                 |                      |
| 3                   | BCL2 53              | 57                    | 50            | 31 (62)                                  | 0.84                 | 14 (45)                                 | 0.32                 |
|                     | Lac Z 1              | 19                    | 18            | 10 (56)                                  |                      | 7 (70)                                  |                      |
| 4                   | BCL2 2               | 70                    | 70            | 49 (70)                                  | 1.00                 | 26 (53)                                 | 0.08                 |
|                     | BCL2 53              | 62                    | 60            | 36 (60)                                  | 0.37                 | 25 (69)                                 | 0.96                 |
|                     | LacZ 1               | 69                    | 68            | 47 (69)                                  |                      | 34 (72)                                 |                      |

a Number and percentage of cleaved embryos developing to at least morula stage;

b Number of grade 1 or 2 blastocysts and as a percentage of those embryos having developed to at least morula stages;

c Significance of difference between BCL2 lines and LacZ control lines as determined by Fisher's exact test.

**Table S3.** Extrinsic apoptosis pathway gene expression in Stage 4 and 5 manually dissected cattle embryos as determined by RNA sequencing (Ref. (42) with Stage 4 TB data not previously published); EPI, epiblast; TB, mural Trophoblast. Values are FPKM (Fragments Per Kilobase of transcript per Million mapped reads) and a value of one corresponds approximately to one transcript per cell. **Movie S1 (separate file).** Type or paste legend here.

| Gene <sup>a</sup>        | St.4 EPI <sup>b</sup> | St.5 EPI   | St.4 TB     | St.5 TB     | Access. No.  |
|--------------------------|-----------------------|------------|-------------|-------------|--------------|
| <b>FAS/FASL</b>          |                       |            |             |             |              |
| FAS ligand               | <b>0.1</b>            | <b>0.6</b> | 1.5         | 0.1         | NM_001098859 |
| FAS                      | 2.7                   | 2.7        | <b>14.0</b> | <b>34.9</b> | NM_174662    |
| <b>TRAIL/DR4 and 5</b>   |                       |            |             |             |              |
| TRAIL (TNFSF10)          | <b>0.0</b>            | <b>0.0</b> | 0.0         | 0.0         | NM_001319901 |
| TNFRSF10a (Trail-R1/DR4) | 0.0                   | 0.0        | <b>0.0</b>  | <b>0.0</b>  | XM_005210265 |
| TNFRSF10b (Trail-R2/DR5) | 19.2                  | 18.0       | <b>50.8</b> | <b>11.6</b> | NM_001102327 |
| <b>TNF/TNFR</b>          |                       |            |             |             |              |
| TNF                      | <b>0.1</b>            | <b>0.1</b> | 1.9         | 0.8         | NM_173966    |
| TNFR1 (TNFRSF1A)         | 18.4                  | 15.6       | <b>2.2</b>  | <b>1.8</b>  | NM_174674    |
| <b>TL1A/DR3</b>          |                       |            |             |             |              |
| TL1A (TNFSF15)           | <b>4.0</b>            | <b>0.4</b> | 13.2        | 3.7         | NM_001205782 |
| DR3 (TNFRSF25)           | 0.2                   | 0.1        | <b>0.3</b>  | <b>0.1</b>  | NM_001144077 |
| <b>DISC</b>              |                       |            |             |             |              |
| FADD                     | 19.8                  | 2.5        | <b>0.6</b>  | <b>0.5</b>  | NM_001007816 |
| CFLIP                    | 1.7                   | 4.7        | <b>4.9</b>  | <b>10.9</b> | NM_001012281 |
| CASP8                    | 0.8                   | 1.3        | <b>3.1</b>  | <b>3.3</b>  | NM_001045970 |

a Ligand/receptor pairs are listed with ligand above receptor(s); DISC refers to the death-inducing signaling complex mediating the extrinsic apoptotic pathway that cannot be inhibited by BCL2 (42).

b The dissected stage 4 epiblast disc includes epiblast as well as the underlying visceral hypoblast.

## SI References

1. A. T. Hertig, J. Rock, E. C. Adams, A description of 34 human ova within the first 17 days of development. *Am J Anat* **98**, 435-493 (1956).
2. W. P. Lockett, Origin and differentiation of the yolk sac and extraembryonic mesoderm in presomite human and rhesus monkey embryos. *Am J Anat* **152**, 59-97 (1978).
3. A. C. Enders, S. Schlafke, A. G. Hendrickx, Differentiation of the embryonic disc, amnion, and yolk sac in the rhesus monkey. *Am J Anat* **177**, 161-185 (1986).
4. J. P. Hill, Croonian Lecture: The Developmental History of the Primates. *Philosophical Transactions of the Royal Society of London. Series B, Containing Papers of a Biological Character (1896-1934)* **221**, 45-178 (1932).
5. A. A. W. Hubrecht, *Furchung und Keimblattbildung bei Tarsius spectrum* (Johannes Mueller, Amsterdam, 1902).
6. J. P. Hill, F. E. Ince, A. S. Rau, Development of the Foetal Membranes in Loris , with special reference to the Mode of Vascularisation of the Chorion in the Lemuroidea and its Phylogenetic Significance. *Proceedings of the Zoological Society of London* **98**, 699-716 (1928).
7. P. Gerard, Etudes sur l'ovogenèse chez les lémuriers du genre Galago. *Arch Biol* **43**, 93-151 (1932).
8. A. Carter, A. M. Mess, Placentation in the colugos *Cynocephalus volans* and *Galeopterus variegatus* (Dermoptera) and the transition from labyrinthine to villous placentation in primates. *Placenta* **55** (2017).
9. H. W. Mossman, Comparative morphogenesis of the fetal membranes and accessory uterine structures. *Contrib Embryol* **26**, 133-137 (1937).
10. A. J. Copp, J. R. Clarke, Role of the polar trophoctoderm in determining the pattern of early post-implantation morphogenesis in mammals: evidence from development of the short-tailed field vole, *Microtus agrestis*. *Placenta* **9**, 643-653 (1988).
11. G. Sansom, J. Hill, Observations on the structure and mode of implantation of the blastocyst of *Cavia*. *Trans. Soc. Zool. London* **21**, 295-354 (1931).
12. C. M. Roberts, J. S. Perry, Hystricomorph embryology. *Symp. zool. Soc. Lond.* **34**, 265-301 (1974).
13. H. W. Mossman, L. A. Weisfeldt, The fetal membranes of a primitive rodent, the thirteen-striped ground squirrel. *Am J Anat* **64**, 59-109 (1939).
14. O. Volker, Ueber die ersten Entwicklungsvorgaenge beim Ziesel. *Anat. Anz.* **33**, 98-111 (1908).
15. D. de Lange, *Handbuch der vergleichenden Anatomie der Wirbeltiere, Placentarbildung.* (Urban und Schwarzenberg, Berlin, 1933).
16. P. Maddox-Hyttel *et al.*, Immunohistochemical and ultrastructural characterization of the initial post-hatching development of bovine embryos. *Reproduction* **125**, 607-623 (2003).
17. J. van Leeuwen, D. K. Berg, P. L. Pfeffer, Morphological and Gene Expression Changes in Cattle Embryos from Hatched Blastocyst to Early Gastrulation Stages after Transfer of In Vitro Produced Embryos. *PloS one* **10**, e0129787 (2015).
18. F. Keibel, Die Entwicklung des Rehes his zur Anlage des Mesoblast. *Arch. Anat. Physiol. Suppl.* **24**, 293-314 (1902).
19. R. Sun *et al.*, Morphological changes and germ layer formation in the porcine embryos from days 7-13 of development. *Zygote* **23**, 266-276 (2015).

20. R. Hassoun, P. Schwartz, K. Feistel, M. Blum, C. Viebahn, Axial differentiation and early gastrulation stages of the pig embryo. *Differentiation* **78**, 301-311 (2009).
21. B. M. Patten, *Embryology of the pig* (The Blakiston Company, Toronto, 1948).
22. J. P. Hill, M. Tribe, The early development of the cat (*Felis domestica*). *Q J Microsc Sci* **68**, 513-U514 (1924).
23. O. Van der Stricht, The blastocyst of the dog. *Journal of Anatomy* **58**, 52-53 (1923).
24. W. J. Hamilton, XI.—The Early Stages in the Development of the Ferret: Fertilisation to the Formation of the Prochordal Plate. *Transactions of the Royal Society of Edinburgh* **58**, 251-278 (1934).
25. A. C. Enders, K. C. Lantz, I. K. Liu, S. Schlafke, Loss of polar trophoblast during differentiation of the blastocyst of the horse. *J Reprod Fertil* **83**, 447-460 (1988).
26. M. van der Merwe, Amniogenesis in the African yellow bat, *Scotophilus dinganii*. *African Zoology* **41**, 234-239 (2006).
27. A. Gopalakrishna, K. B. Karim, Fetal membranes and placentation in Chiroptera. *Reproduction* **56**, 417-429 (1979).
28. M. van der Merwe, Histological study of implantation in the Natal clinging bat (*Miniopterus schreibersii natalensis*). *J Reprod Fertil* **65**, 319-323 (1982).
29. J. J. Rasweiler, Early embryonic development and implantation in bats. *J. Reprod. Fert.* **56**, 403-416 (1979).
30. J. J. t. Rasweiler, N. K. Badwaik, Unusual aspects of inner cell mass formation, endoderm differentiation, Reichert's membrane development, and amniogenesis in the lesser bulldog bat, *Noctilio albiventri*. *The Anatomical record* **246**, 293-304 (1996).
31. W. J. Bleier, Early embryology and implantation in the california leaf-nosed bat, *Macrotus californicus*. **182**, 237-253 (1975).
32. J. J. Rasweiler, Reproduction in the long-tongued Bat, *Glossophaga soricina*. II. Implantation and early embryonic development. *Am J Anat* **139**, 1-35 (1974).
33. N. K. Badwaik, J. J. t. Rasweiler, S. F. Oliveira, Formation of reticulated endoderm, Reichert's membrane, and amniogenesis in blastocysts of captive-bred, short-tailed fruit bats, *Carollia perspicillata*. *The Anatomical record* **247**, 85-101 (1997).
34. A. A. W. Hubrecht, Studies in mammalian embryology. I. The placentation of *Erinaceus europaeus*, with remarks on the phylogeny of the placenta. *Q J Microsc Sci* **30**, 283-404 (1889).
35. A. A. W. Hubrecht, Studies in Mammalian Embryology, II. The Development of the Germinal Layers of *Sorex vulgaris*. *Quart. Journ. Micr. Sci.* **31**, 499-568 (1890).
36. M. Yoshida *et al.*, Conserved and divergent expression patterns of markers of axial development in eutherian mammals. *Developmental Dynamics* **245**, 67-86 (2016).
37. R. H. Goetz, Early development of the Tenrecoidea. *BioMorphosis* **1**, 67-79 (1938).
38. H. Bluntschli, Le développement primaire et l'implantation chez un Centetiné (Hemicentetes). *C. R. Ass. Anat.* **33**, 39-46 (1938).
39. V. Gabie, The early embryology of *Eremitalpa granti* (Broom). *Journal of Morphology* **104**, 181-203 (1959).
40. C. J. van der Horst, The placentation of Elephantulus. *Transactions of the Royal Society of South Africa* **32**, 435-629 (1949).
41. J. T. Patterson, *Polyembryonic development in Tatusia novemcincta* (n.p., 1913).
42. M. S. D'Arcy, Cell death: a review of the major forms of apoptosis, necrosis and autophagy. *Cell Biology International* **43**, 582-592 (2019).
